# Supplementary material
Source: ML conference proceedings conference paper supplement (https://openaccess.thecvf.com/content/CVPR2024/html/Huang_Photo-SLAM_Real-time_Simultaneous_CVPR_2024_paper.html)
Supplement: Supplementary file 1 [file Huang_Photo-SLAM_Real-time_Simultaneous_CVPR_2024_supplemental.pdf]

# Photo-SLAM: Real-time Simultaneous Localization and Photorealistic Mapping for Monocular, Stereo, and RGB-D Cameras

## - Supplementary Material -

Huajian Huang<sup>1</sup> Longwei Li<sup>2</sup> Hui Cheng<sup>2</sup> Sai-Kit Yeung<sup>1</sup>

<sup>1</sup>The Hong Kong University of Science and Technology <sup>2</sup>Sun Yat-sen University

hhuangbg@connect.ust.hk, lilw23@mail2.sysu.edu.cn, chengh9@mail.sysu.edu.cn, saikit@ust.hk

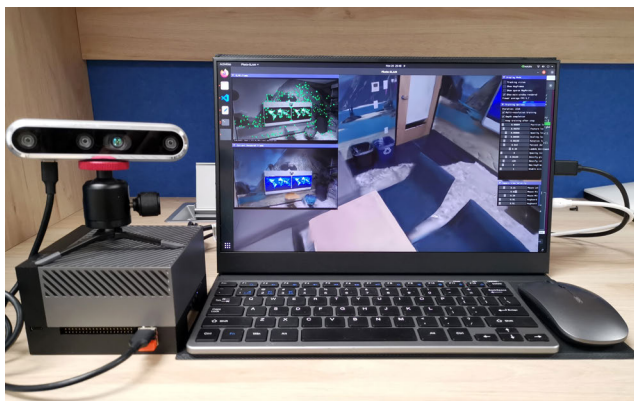

Figure 1. The proposed system has real-time performance on embedded platforms, such as Jetson AGX Orin Developer Kit.

Photo-SLAM is a novel system for simultaneous localization and photorealistic mapping, which can even run on embedded platforms at real-time speed, as demonstrated in Fig. 1. In this supplementary, we provide additional results regarding localization and mapping performance.

## 1. Localization

**Stability.** As online systems, SLAMs are required to process the incoming frames and estimate current camera poses in time. Therefore, tracking stability regarding latency and the average processing time is an important factor in evaluating system performance in addition to pose estimation accuracy. As reported in Table 1 of the main paper, Photo-SLAM is capable of processing more than 40 frames per second with accurate pose estimation. The average tracking speed is about six times faster than ESLAM [1] and three times faster than Co-SLAM [3]. Here, we provide additional analysis on tracking stability while an example plotted in Fig. 2.

Although the average tracking time of Go-SLAM [4] is less than Co-SLAM and ESLAM, the processing latency

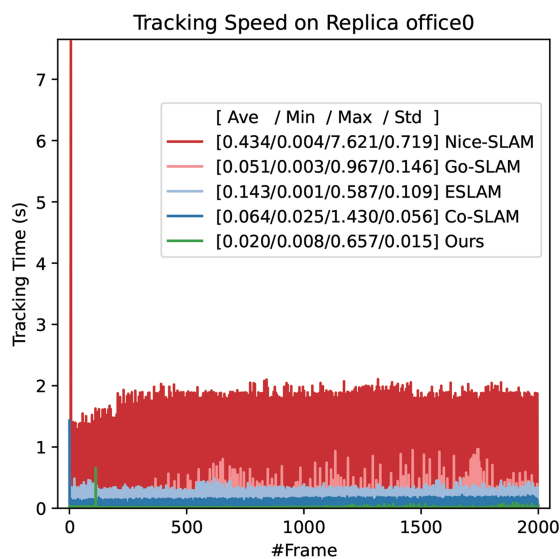

Figure 2. Tracking speed comparisons on scene office0 using an RGB-D camera. The vertical axis denotes the processing time of each frame while the horizontal axis denotes the frame number. [Ave/Min/Max/Std] represent the average, minimum, and maximum tracking time and its standard deviation respectively.

is high due to frequently conducting expensive global optimization. As shown in Fig. 2, Go-SLAM often takes about 1 second to process the frame and estimate the pose. Moreover, both Nice-SLAM [5] and Co-SLAM need a longer time to accurately initialize the tracking. Obviously, our system can rapidly and stably process the incoming frames, having minimum average tracking time and standard deviation. The peak processing time of our system occurs when loop closure is detected for correcting pose estimation drift.

**Accuracy.** Some qualitative tracking results of Photo-SLAM are demonstrated in Fig. 3.

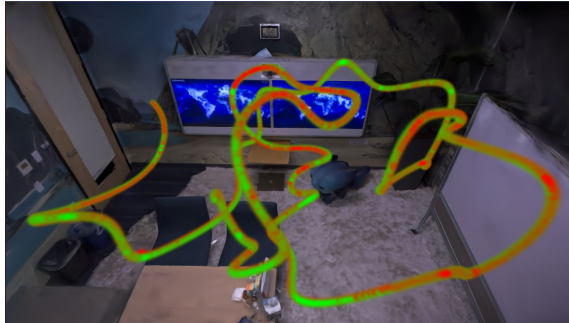

(a) Replica office0

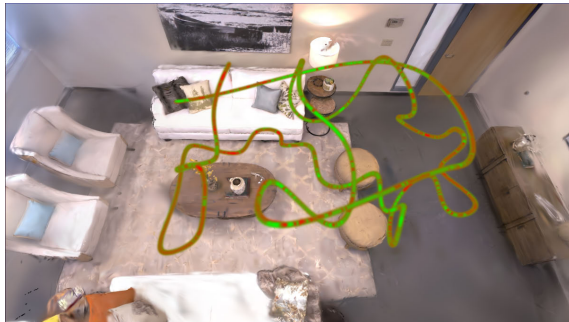

(b) Replica room0

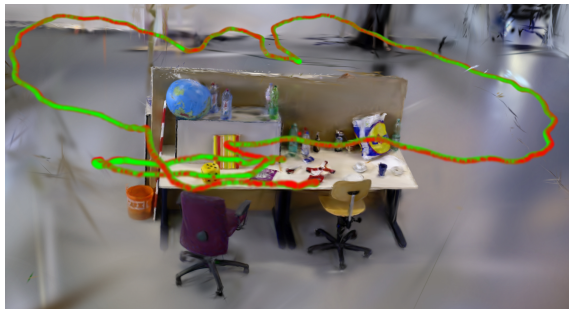

(c) TUM fr3-office

Figure 3. Trajectory in the reconstructed map. Green points denote ground truth trajectory while red denotes the estimated trajectory of Photo-SLAM.

## 2. Discussion

**Online Mapping vs Offline Mapping.** For online mapping, the mapping process occurs simultaneously with the localization process. Therefore it requires continuous and prompt updates with each new observation as the robot or camera moves and observes its surroundings. In general, online photorealistic mapping is more challenging than offline photorealistic mapping, since it is crucial to balance the trade-off between computational efficiency and rendering quality. As mentioned in the main paper, we proposed a geometry-based densification strategy and a Gaussian-Pyramid-based (GP) learning method to achieve high-quality online mapping. To further support this statement, we compared the photorealistic mapping perfor-

| method           | PSNR $\uparrow$ | SSIM $\uparrow$ | LPIPS $\downarrow$ | Rendering FPS $\uparrow$ | Model Size (MB) |
|------------------|-----------------|-----------------|--------------------|--------------------------|-----------------|
| 1) 3DG           | 27.844          | 0.861           | 0.213              | 745.480                  | 36.141          |
| 2) 3DG           | 34.555          | 0.942           | 0.065              | 483.904                  | 144.196         |
| 3) 3DG           | 37.055          | 0.962           | 0.032              | 448.109                  | 219.470         |
| Ours using Mono  | 33.302          | 0.926           | 0.078              | 911.262                  | 31.419          |
| Ours using RGB-D | 34.958          | 0.942           | 0.059              | 1084.017                 | 35.211          |

Table 1. Comparison of mapping performance between 3D Gaussian splatting (3DG) and our system Photo-SLAM with different settings on the Replica dataset.

| On TUM Dataset |       |               | Resources               |                          |                 |
|----------------|-------|---------------|-------------------------|--------------------------|-----------------|
| Scene          | Cam   | Method        | Tracking FPS $\uparrow$ | Rendering FPS $\uparrow$ | Model Size (MB) |
| fr1-desk       | Mono  | Ours (Jetson) | 28.267                  | 340.507                  | 4.610           |
|                |       | Ours (Laptop) | 28.330                  | 1105.062                 | 7.421           |
|                |       | Ours          | 57.781                  | 2016.690                 | 10.027          |
|                | RGB-D | Ours (Jetson) | 27.970                  | 380.622                  | 5.743           |
|                |       | Ours (Laptop) | 28.930                  | 1061.040                 | 8.432           |
|                |       | Ours          | 58.378                  | 2083.896                 | 9.963           |
| fr2-xyz        | Mono  | Ours (Jetson) | 24.005                  | 169.321                  | 14.286          |
|                |       | Ours (Laptop) | 24.922                  | 619.554                  | 16.102          |
|                |       | Ours          | 58.241                  | 1405.797                 | 20.380          |
|                | RGB-D | Ours (Jetson) | 21.032                  | 274.718                  | 6.319           |
|                |       | Ours (Laptop) | 22.665                  | 701.590                  | 13.850          |
|                |       | Ours          | 52.904                  | 1790.120                 | 21.399          |
| fr3-office     | Mono  | Ours (Jetson) | 36.700                  | 291.398                  | 10.669          |
|                |       | Ours (Laptop) | 38.929                  | 824.658                  | 16.249          |
|                |       | Ours          | 81.575                  | 1522.120                 | 19.211          |
|                | RGB-D | Ours (Jetson) | 18.039                  | 291.907                  | 12.726          |
|                |       | Ours (Laptop) | 19.636                  | 764.342                  | 15.349          |
|                |       | Ours          | 43.650                  | 1540.757                 | 17.009          |

Table 2. Additional results of Photo-SLAM with different platforms on the TUM dataset.

mance between our Photo-SLAM and 3D Gaussian splatting (3DG) [2]. 3DG is the SOTA offline method which takes a set of images with known poses and a sparse point cloud as input to learn a radiance field for view synthesis. During the experiments, 3DG used the keyframe poses estimated by Photo-SLAM and performed training for the same duration as Photo-SLAM. The required point cloud input is initialized in three different ways: 1) randomly initializing 100 points; 2) randomly initializing 10,000 points; and 3) initializing from the hyper primitives map of Photo-SLAM. The results are reported in Table 1. Without inputting fine-grained point clouds, 3DG needs more time for optimization such that the rendering quality decreases. In addition, to enhance rendering quality, 3DG tends to densify point clouds leading to larger model size and slower rendering speed. Whether using monocular cameras or RGB-D cameras, Photo-SLAM consistently delivers compelling rendering quality and faster rendering speeds, owing to the effectiveness of the proposed algorithms.

| On EuRoC Dataset |                      | Resources                  |                             |                    |
|------------------|----------------------|----------------------------|-----------------------------|--------------------|
| Scene            | Method               | Tracking<br>FPS $\uparrow$ | Rendering<br>FPS $\uparrow$ | Model Size<br>(MB) |
| MH-01            | <b>Ours (Jetson)</b> | 21.359                     | 93.762                      | 43.385             |
|                  | <b>Ours (Laptop)</b> | 25.019                     | 316.403                     | 89.700             |
|                  | <b>Ours</b>          | 44.977                     | 613.958                     | 123.528            |
| MH-02            | <b>Ours (Jetson)</b> | 22.355                     | 101.021                     | 36.263             |
|                  | <b>Ours (Laptop)</b> | 26.189                     | 332.174                     | 81.569             |
|                  | <b>Ours</b>          | 46.556                     | 675.508                     | 113.116            |
| V1-01            | <b>Ours (Jetson)</b> | 21.332                     | 106.008                     | 28.444             |
|                  | <b>Ours (Laptop)</b> | 25.403                     | 367.903                     | 55.263             |
|                  | <b>Ours</b>          | 44.763                     | 835.119                     | 74.457             |
| V2-01            | <b>Ours (Jetson)</b> | 23.872                     | 99.988                      | 27.840             |
|                  | <b>Ours (Laptop)</b> | 27.556                     | 307.025                     | 62.588             |
|                  | <b>Ours</b>          | 48.911                     | 595.234                     | 82.600             |

Table 3. Additional results of Photo-SLAM with different platforms on the EuRoC MAV stereo dataset.

### 3. More Results

The results of each scene of the replica dataset are detailed in Table 4. Additional qualitative results on the TUM dataset are demonstrated on Fig. 4 and Fig. 5, while Fig. 6 illustrates qualitative results of Photo-SLAM on EuReC Stereo Dataset.

### References

- [1] Mohammad Mahdi Johari, Camilla Carta, and François Fleuret. Eslam: Efficient dense slam system based on hybrid representation of signed distance fields. In *Proceedings of the IEEE/CVF Conference on Computer Vision and Pattern Recognition*, pages 17408–17419, 2023.
- [2] Bernhard Kerbl, Georgios Kopanas, Thomas Leimkühler, and George Drettakis. 3d gaussian splatting for real-time radiance field rendering. *ACM Transactions on Graphics (ToG)*, 42(4): 1–14, 2023.
- [3] Hengyi Wang, Jingwen Wang, and Lourdes Agapito. Cosl原因: Joint coordinate and sparse parametric encodings for neural real-time slam. In *Proceedings of the IEEE/CVF Conference on Computer Vision and Pattern Recognition*, pages 13293–13302, 2023.
- [4] Youmin Zhang, Fabio Tosi, Stefano Mattoccia, and Matteo Poggi. Go-slam: Global optimization for consistent 3d instant reconstruction. In *Proceedings of the IEEE/CVF International Conference on Computer Vision*, pages 3727–3737, 2023.
- [5] Zihan Zhu, Songyou Peng, Viktor Larsson, Weiwei Xu, Hujun Bao, Zhaopeng Cui, Martin R Oswald, and Marc Pollefeys. Nice-slam: Neural implicit scalable encoding for slam. In *Proceedings of the IEEE/CVF Conference on Computer Vision and Pattern Recognition*, pages 12786–12796, 2022.

| On Replica Dataset |       |                      | Localization                          |                      | Mapping |        |         | Resources         |                    |                    |
|--------------------|-------|----------------------|---------------------------------------|----------------------|---------|--------|---------|-------------------|--------------------|--------------------|
| Scene              | Cam   | Method               | Trajectory<br>(RMSE <sub>cm</sub> ) ↓ | Rotation<br>(RMSE) ↓ | PSNR ↑  | SSIM ↑ | LPIPS ↓ | Tracking<br>FPS ↑ | Rendering<br>FPS ↑ | Model Size<br>(MB) |
| office0            | Mono  | <b>Ours (Jetson)</b> | 0.467                                 | 0.00334              | 34.415  | 0.940  | 0.949   | 18.328            | 123.551            | 17.703             |
|                    |       | <b>Ours (Laptop)</b> | 0.587                                 | 0.00343              | 36.227  | 0.954  | 0.071   | 20.422            | 413.645            | 21.703             |
|                    |       | <b>Ours</b>          | 0.575                                 | 0.00369              | 36.989  | 0.955  | 0.061   | 42.487            | 930.598            | 24.975             |
|                    | RGB-D | <b>Ours (Jetson)</b> | 0.499                                 | 0.00356              | 35.447  | 0.949  | 0.086   | 19.076            | 154.087            | 18.281             |
|                    |       | <b>Ours (Laptop)</b> | 0.519                                 | 0.00317              | 38.219  | 0.965  | 0.053   | 22.446            | 497.917            | 18.826             |
|                    |       | <b>Ours</b>          | 0.522                                 | 0.00307              | 38.477  | 0.964  | 0.050   | 48.588            | 1447.887           | 19.740             |
| office1            | Mono  | <b>Ours (Jetson)</b> | 5.586                                 | 0.31140              | 32.382  | 0.904  | 0.113   | 18.312            | 80.048             | 22.904             |
|                    |       | <b>Ours (Laptop)</b> | 0.379                                 | 0.00463              | 37.970  | 0.954  | 0.060   | 19.968            | 322.160            | 21.224             |
|                    |       | <b>Ours</b>          | 0.315                                 | 0.00383              | 37.592  | 0.950  | 0.062   | 42.296            | 857.324            | 26.982             |
|                    | RGB-D | <b>Ours (Jetson)</b> | 0.402                                 | 0.00517              | 37.510  | 0.953  | 0.065   | 19.194            | 118.584            | 20.656             |
|                    |       | <b>Ours (Laptop)</b> | 0.440                                 | 0.00543              | 39.109  | 0.962  | 0.049   | 22.349            | 496.644            | 19.548             |
|                    |       | <b>Ours</b>          | 0.436                                 | 0.00477              | 39.089  | 0.961  | 0.047   | 47.333            | 1263.343           | 21.193             |
| office2            | Mono  | <b>Ours (Jetson)</b> | 1.402                                 | 0.01452              | 28.083  | 0.900  | 0.131   | 17.502            | 90.181             | 19.704             |
|                    |       | <b>Ours (Laptop)</b> | 2.087                                 | 0.02154              | 31.202  | 0.927  | 0.098   | 18.975            | 343.662            | 27.332             |
|                    |       | <b>Ours</b>          | 5.031                                 | 0.04696              | 31.794  | 0.929  | 0.091   | 39.604            | 930.777            | 31.558             |
|                    | RGB-D | <b>Ours (Jetson)</b> | 1.209                                 | 0.00964              | 29.755  | 0.919  | 0.110   | 17.860            | 124.420            | 27.560             |
|                    |       | <b>Ours (Laptop)</b> | 1.188                                 | 0.00972              | 32.720  | 0.940  | 0.080   | 21.507            | 425.452            | 31.711             |
|                    |       | <b>Ours</b>          | 1.276                                 | 0.01094              | 33.034  | 0.938  | 0.077   | 44.062            | 904.249            | 34.065             |
| office3            | Mono  | <b>Ours (Jetson)</b> | 0.429                                 | 0.00232              | 28.058  | 0.886  | 0.132   | 17.881            | 96.872             | 15.505             |
|                    |       | <b>Ours (Laptop)</b> | 0.409                                 | 0.00239              | 32.012  | 0.924  | 0.090   | 19.518            | 368.530            | 20.475             |
|                    |       | <b>Ours</b>          | 0.472                                 | 0.00227              | 31.622  | 0.920  | 0.086   | 40.870            | 1131.957           | 26.653             |
|                    | RGB-D | <b>Ours (Jetson)</b> | 0.718                                 | 0.00222              | 30.954  | 0.917  | 0.103   | 17.889            | 120.118            | 20.270             |
|                    |       | <b>Ours (Laptop)</b> | 0.747                                 | 0.00233              | 33.594  | 0.939  | 0.072   | 20.051            | 388.624            | 23.617             |
|                    |       | <b>Ours</b>          | 0.782                                 | 0.00233              | 33.789  | 0.938  | 0.066   | 40.603            | 1125.175           | 25.226             |
| office4            | Mono  | <b>Ours (Jetson)</b> | 0.579                                 | 0.00305              | 30.399  | 0.921  | 0.109   | 18.755            | 102.949            | 15.201             |
|                    |       | <b>Ours (Laptop)</b> | 0.616                                 | 0.00279              | 33.656  | 0.940  | 0.078   | 20.311            | 375.033            | 21.444             |
|                    |       | <b>Ours</b>          | 0.583                                 | 0.00272              | 34.168  | 0.941  | 0.072   | 42.262            | 849.305            | 26.154             |
|                    | RGB-D | <b>Ours (Jetson)</b> | 0.661                                 | 0.00367              | 32.219  | 0.931  | 0.091   | 17.107            | 92.237             | 32.405             |
|                    |       | <b>Ours (Laptop)</b> | 0.629                                 | 0.00446              | 35.534  | 0.951  | 0.059   | 19.361            | 333.874            | 32.270             |
|                    |       | <b>Ours</b>          | 0.582                                 | 0.00423              | 36.020  | 0.952  | 0.054   | 39.870            | 1061.749           | 35.421             |
| room0              | Mono  | <b>Ours (Jetson)</b> | 0.369                                 | 0.00321              | 26.423  | 0.787  | 0.221   | 17.987            | 87.246             | 17.121             |
|                    |       | <b>Ours (Laptop)</b> | 0.349                                 | 0.00294              | 29.899  | 0.868  | 0.125   | 19.521            | 332.127            | 33.151             |
|                    |       | <b>Ours</b>          | 0.345                                 | 0.00299              | 29.772  | 0.871  | 0.106   | 41.020            | 754.729            | 44.333             |
|                    | RGB-D | <b>Ours (Jetson)</b> | 0.514                                 | 0.00265              | 27.867  | 0.833  | 0.165   | 17.424            | 104.248            | 31.196             |
|                    |       | <b>Ours (Laptop)</b> | 0.521                                 | 0.00257              | 31.288  | 0.914  | 0.075   | 19.119            | 322.585            | 52.266             |
|                    |       | <b>Ours</b>          | 0.541                                 | 0.00270              | 30.716  | 0.899  | 0.075   | 39.825            | 897.870            | 55.397             |
| room1              | Mono  | <b>Ours (Jetson)</b> | 0.803                                 | 0.00670              | 27.076  | 0.841  | 0.177   | 19.834            | 99.038             | 19.699             |
|                    |       | <b>Ours (Laptop)</b> | 1.046                                 | 0.00868              | 30.459  | 0.902  | 0.092   | 21.580            | 333.430            | 32.959             |
|                    |       | <b>Ours</b>          | 1.183                                 | 0.00772              | 31.302  | 0.910  | 0.083   | 44.316            | 782.326            | 43.865             |
|                    | RGB-D | <b>Ours (Jetson)</b> | 0.381                                 | 0.00299              | 30.191  | 0.895  | 0.108   | 18.881            | 121.986            | 29.503             |
|                    |       | <b>Ours (Laptop)</b> | 0.399                                 | 0.00277              | 33.071  | 0.931  | 0.062   | 21.782            | 367.455            | 43.568             |
|                    |       | <b>Ours</b>          | 0.394                                 | 0.00320              | 33.511  | 0.934  | 0.057   | 43.352            | 1018.111           | 49.617             |
| room2              | Mono  | <b>Ours (Jetson)</b> | 0.241                                 | 0.00280              | 27.432  | 0.889  | 0.138   | 17.918            | 80.568             | 16.303             |
|                    |       | <b>Ours (Laptop)</b> | 0.235                                 | 0.00263              | 32.970  | 0.935  | 0.075   | 19.499            | 339.442            | 22.790             |
|                    |       | <b>Ours</b>          | 0.225                                 | 0.00258              | 33.181  | 0.934  | 0.067   | 40.313            | 1053.078           | 26.834             |
|                    | RGB-D | <b>Ours (Jetson)</b> | 0.260                                 | 0.00257              | 31.883  | 0.928  | 0.078   | 15.982            | 95.480             | 33.592             |
|                    |       | <b>Ours (Laptop)</b> | 0.275                                 | 0.00250              | 35.295  | 0.954  | 0.045   | 18.158            | 336.103            | 38.307             |
|                    |       | <b>Ours</b>          | 0.305                                 | 0.00257              | 35.028  | 0.951  | 0.043   | 36.244            | 953.755            | 41.032             |

Table 4. Detailed results of Photo-SLAM with different platforms on the Replica dataset.

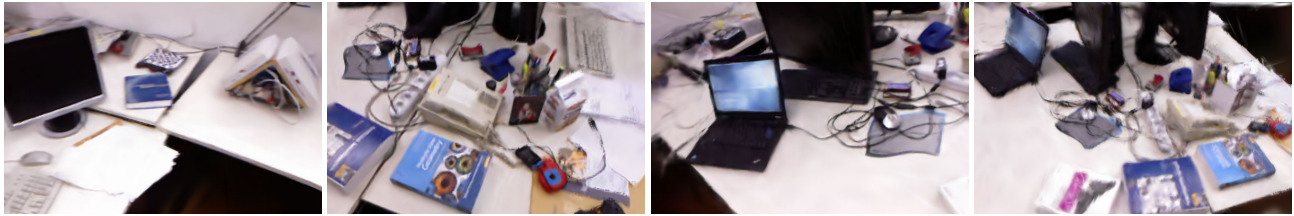

(a) fr1-desk (Mono)

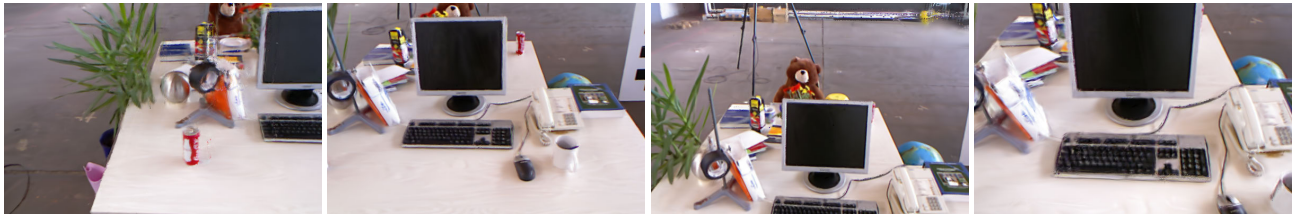

(b) fr2-xyz (Mono)

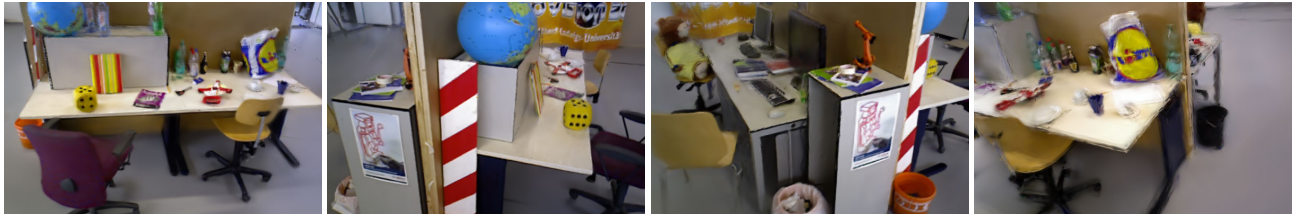

(c) fr3-office (Mono)

Figure 4. Qualitative results of Photo-SLAM on TUM using monocular cameras.

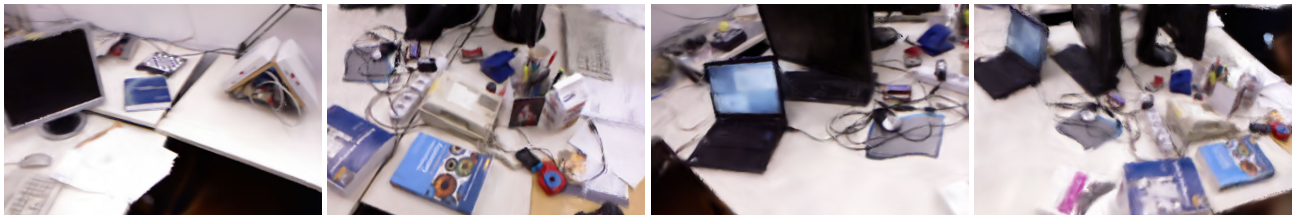

(a) fr1-desk (RGB-D)

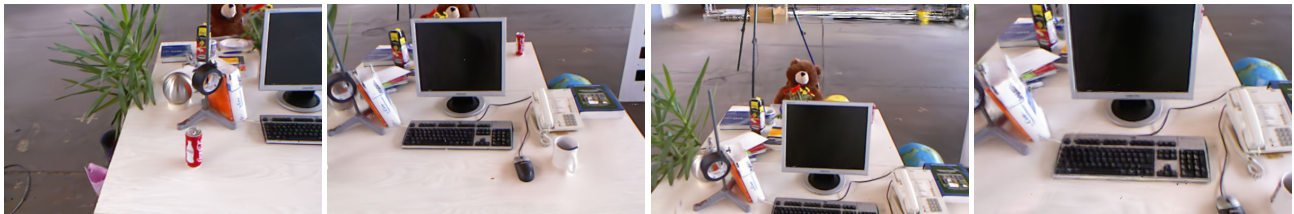

(b) fr2-xyz (RGB-D)

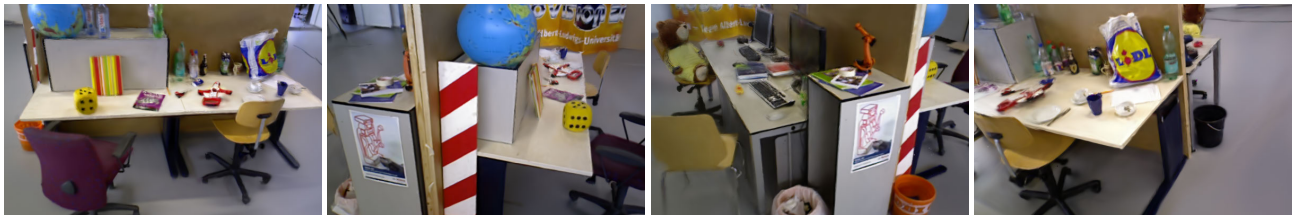

(c) fr3-office (RGB-D)

Figure 5. Qualitative results of Photo-SLAM on TUM using RGB-D cameras.

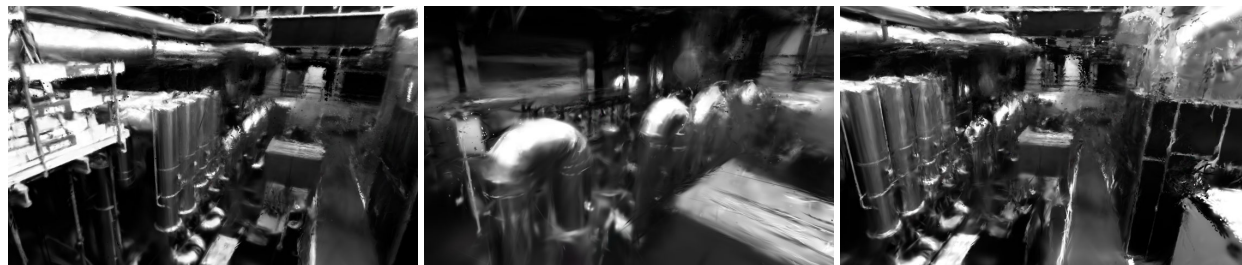

(a) EuRoC MH-01

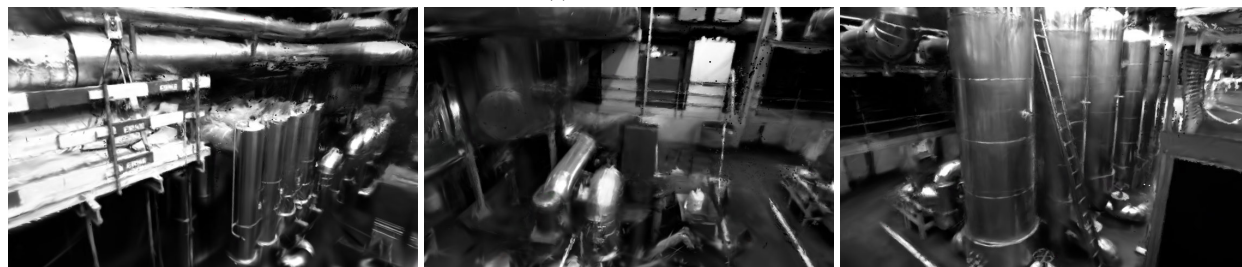

(b) EuRoC MH-02

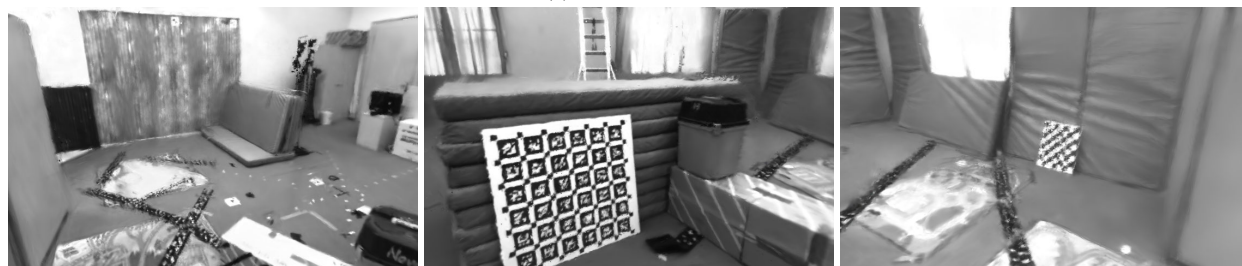

(c) EuRoC V1-01

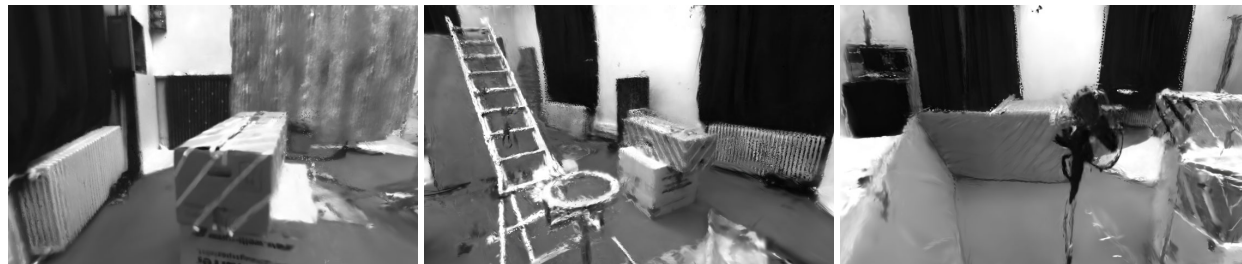

(d) EuRoC V2-01

Figure 6. Qualitative results of Photo-SLAM on stereo EuRoC.
